# Supplementary material for: Cyantraniliprole and Thiamethoxam Exposure Changes Expression of Transcripts Associated with Small Non-Coding RNA Processing in the Colorado Potato Beetle
Source: MDPI journal article supplement (doi:10.3390/insects15030147), 2024-02-22
Supplement: s1 [file s1]

**Table S1****(A)**

| Dose    | Insects (impaired/total) | Mortality |
|---------|--------------------------|-----------|
| Control | 0/20                     | 0 %       |
| 0.01 µg | 1/20                     | 5 %       |
| 0.05 µg | 4/20                     | 20 %      |
| 0.1 µg  | 10/20                    | 50 %      |
| 0.5 µg  | 16/20                    | 80 %      |
| 1.0 µg  | 18/20                    | 90 %      |
| 5.0 µg  | 19/20                    | 95 %      |

**(B)**

| Dose    | Insects (impaired/total) | Mortality |
|---------|--------------------------|-----------|
| Control | 1/20                     | 5 %       |
| 0.01 µg | 1/20                     | 5 %       |
| 0.05 µg | 4/20                     | 20 %      |
| 0.1 µg  | 4/20                     | 20 %      |
| 0.5 µg  | 14/20                    | 70 %      |
| 1.0 µg  | 17/20                    | 85 %      |
| 5.0 µg  | 19/20                    | 95 %      |

**Table S1.** Effect of cyantraniliprole or thiamethoxam treatments on adult *L. decemlineata*. Table shows impact on insects treated to different doses of these compounds for a period of 24 hours. Results presented for *L. decemlineata* exposed to (A) cyantraniliprole or (B) thiamethoxam. Control insects were treated with acetone.
